# Supplementary material for: Spatial and temporal evolution of Lassa virus in the natural host population in Upper Guinea
Source: PubMed Central journal article supplement (PMC4766397; doi:10.1038/srep21977), 2016-02-25
Supplement: srep21977-s1.pdf [file srep21977-s1.pdf]

## Supplementary information

### Title: Spatial and temporal evolution of Lassa virus in the natural host population in Upper Guinea

Authors: Elisabeth Fichet-Calvet<sup>1\*</sup>, Stephan Ölschläger<sup>1</sup>, Thomas Strecker<sup>2</sup>, Lamine Koivogui<sup>3</sup>, Beate Becker-Ziaja<sup>1</sup>, Amara Bongo Camara<sup>3</sup>, Barré Soropogui<sup>3</sup>, N’Faly Magassouba<sup>3</sup> and Stephan Günther<sup>1</sup>

Table S1: Comparison of different models using Akaike’s information criterion through Markov chain Monte Carlo (AICM). Lower values of marginal likelihood indicate a better fit to the data. The best-fit model is indicated in bold.

| Model     | Settings      |                 | AICM value   |                 |
|-----------|---------------|-----------------|--------------|-----------------|
|           | Clock         | Population      | +/-          | standard error  |
| <b>#1</b> | <b>Strict</b> | <b>Constant</b> | <b>11836</b> | <b>+/- 0.54</b> |
| #5        | Strict        | Exponential     | 11866        | +/- 0.48        |
| #6        | Strict        | Logistic        | 11861        | +/- 0.81        |
| #7        | Strict        | Skyline         | 11865        | +/- 0.45        |
| #3        | Relaxed       | Constant        | 11911        | +/- 0.65        |
| #8        | Relaxed       | Exponential     | 11913        | +/- 0.86        |
| #9        | Relaxed       | Logistic        | 11923        | +/- 1.10        |
| #10       | Relaxed       | Skyline         | 11933        | +/- 1.11        |

Analysis was performed using GTR+gamma without codon partitioning.

Table S2: List of the 132 LASV positive *M. natalensis* included in the study with trapping date, trapping site (village, habitat, and line), sex, and GenBank accession number of the LASV sequence (ID). For animals trapped outside of houses, the distance from the trapping site to the nearest house (dist) is provided.

| N°viro | Village  | date        | sex | habitat                 | line    | dist  | ID       |
|--------|----------|-------------|-----|-------------------------|---------|-------|----------|
| 129    | Gbetaya  | 21-May-2003 | f   | houses                  | line 1  |       | KP339050 |
| 132    | Gbetaya  | 21-May-2003 | f   | houses                  | line 1  |       | KP339051 |
| 148    | Gbetaya  | 22-May-2003 | m   | houses                  | line 1  |       | KP339052 |
| 153    | Gbetaya  | 22-May-2003 | m   | houses                  | line 1  |       | KP339053 |
| 170    | Gbetaya  | 23-May-2003 | f   | cultivation and bananas | line 2  | 150 m | KP339054 |
| 185    | Bantou   | 25-May-2003 | f   | cultivation and orchard | line 2  | 700 m | KP339055 |
| 263    | Bantou   | 24-Sep-2003 | m   | houses                  | line 1  |       | KP339056 |
| 289    | Bantou   | 25-Sep-2003 | m   | houses                  | line 1  |       | KP339057 |
| 302    | Bantou   | 26-Sep-2003 | m   | houses                  | line 1  |       | KP339058 |
| 350    | Bantou   | 27-Sep-2003 | f   | maize                   | line 14 | 60 m  | KP339059 |
| 353    | Bantou   | 27-Sep-2003 | f   | maize                   | line 14 | 60 m  | KP339060 |
| 354    | Bantou   | 27-Sep-2003 | m   | maize                   | line 14 | 60 m  | KP339061 |
| 356    | Bantou   | 27-Sep-2003 | m   | maize                   | line 18 | 100 m | KP339062 |
| 366    | Bantou   | 28-Sep-2003 | m   | maize                   | line 18 | 100 m | KP339063 |
| 375    | Bantou   | 28-Sep-2003 | f   | maize                   | line 10 | 50 m  | KP339064 |
| 377    | Bantou   | 28-Sep-2003 | f   | maize                   | line 10 | 50 m  | KP339065 |
| 378    | Bantou   | 28-Sep-2003 | m   | maize                   | line 13 | 50 m  | KP339066 |
| 382    | Bantou   | 28-Sep-2003 | f   | maize                   | line 14 | 60 m  | KP339067 |
| 384    | Bantou   | 28-Sep-2003 | f   | maize                   | line 14 | 60 m  | KP339068 |
| 390    | Bantou   | 29-Sep-2003 | f   | maize                   | line 10 | 50 m  | KP339069 |
| 396    | Bantou   | 29-Sep-2003 | m   | maize                   | line 14 | 60 m  | KP339070 |
| 416    | Tanganya | 2-Oct-2003  | f   | houses                  | line 1  |       | KP339071 |
| 417    | Tanganya | 2-Oct-2003  | f   | houses                  | line 1  |       | KP339072 |
| 425    | Tanganya | 2-Oct-2003  | f   | maize and ochra         | line 3  | 30 m  | KP339073 |
| 431    | Tanganya | 2-Oct-2003  | m   | houses                  | line 1  |       | KP339074 |
| 444    | Tanganya | 3-Oct-2003  | m   | houses                  | line 1  |       | KP339075 |
| 462    | Tanganya | 4-Oct-2003  | m   | houses                  | line 1  |       | KP339076 |
| 464    | Tanganya | 4-Oct-2003  | f   | houses                  | line 1  |       | KP339077 |
| 471    | Tanganya | 4-Oct-2003  | m   | maize and ochra         | line 3  | 30 m  | KP339078 |
| 491    | Tanganya | 5-Oct-2003  | m   | wooded fallowland       | line 12 | 80 m  | KP339079 |
| 497    | Tanganya | 5-Oct-2003  | f   | grassland and pasture   | line 14 | 50 m  | KP339080 |
| 686    | Bantou   | 27-Jan-2004 | f   | houses                  | line 1  |       | KP339081 |
| 717    | Bantou   | 27-Jan-2004 | m   | houses                  | line 1  |       | KP339082 |
| 813    | Tanganya | 1-Feb-2004  | f   | houses                  | line 1  |       | KP339083 |
| 817    | Tanganya | 1-Feb-2004  | m   | houses                  | line 1  |       | KP339084 |
| 820    | Tanganya | 1-Feb-2004  | m   | houses                  | line 1  |       | KP339085 |

|      |          |             |   |                         |         |       |          |
|------|----------|-------------|---|-------------------------|---------|-------|----------|
| 846  | Tanganya | 2-Feb-2004  | f | houses                  | line 1  |       | KP339086 |
| 903  | Bantou   | 21-May-2004 | m | houses                  | line 1  |       | KP339087 |
| 909  | Bantou   | 21-May-2004 | f | houses                  | line 1  |       | KP339088 |
| 936  | Bantou   | 22-May-2004 | f | houses                  | line 1  |       | KP339089 |
| 939  | Bantou   | 22-May-2004 | m | houses                  | line 1  |       | KP339090 |
| 959  | Bantou   | 22-May-2004 | f | cultivation/fallowland  | line 2  | 50 m  | KP339091 |
| 966  | Bantou   | 22-May-2004 | m | cultivation/fallowland  | line 5  | 30 m  | KP339092 |
| 987  | Bantou   | 23-May-2004 | f | houses                  | line 1  |       | KP339093 |
| 991  | Bantou   | 23-May-2004 | m | cultivation/fallowland  | line 2  | 50 m  | KP339094 |
| 1007 | Tanganya | 29-May-2004 | f | houses                  | line 1  |       | KP339095 |
| 1008 | Tanganya | 29-May-2004 | f | houses                  | line 1  |       | KP339096 |
| 1010 | Tanganya | 29-May-2004 | f | houses                  | line 1  |       | KP339097 |
| 1011 | Tanganya | 29-May-2004 | m | houses                  | line 1  |       | KP339098 |
| 1033 | Tanganya | 30-May-2004 | m | houses                  | line 1  |       | KP339099 |
| 1034 | Tanganya | 30-May-2004 | m | houses                  | line 1  |       | KP339100 |
| 1066 | Tanganya | 30-May-2004 | m | cultivation and orchard | line 4  | 40 m  | KP339101 |
| 1074 | Tanganya | 31-May-2004 | m | houses                  | line 1  |       | KP339102 |
| 1198 | Bantou   | 4-Oct-2004  | m | cultivation/fallowland  | line 9  | 50 m  | KP339103 |
| 1207 | Bantou   | 5-Oct-2004  | m | houses                  | line 1  |       | KP339104 |
| 1210 | Bantou   | 5-Oct-2004  | m | houses                  | line 1  |       | KP339105 |
| 1240 | Bantou   | 6-Oct-2004  | m | houses                  | line 1  |       | KP339106 |
| 1241 | Bantou   | 6-Oct-2004  | f | houses                  | line 1  |       | KP339107 |
| 1242 | Bantou   | 6-Oct-2004  | m | houses                  | line 1  |       | KP339108 |
| 1259 | Bantou   | 6-Oct-2004  | m | maize                   | line 10 | 50 m  | KP339109 |
| 1276 | Tanganya | 10-Oct-2004 | f | houses                  | line 1  |       | KP339110 |
| 1310 | Tanganya | 11-Oct-2004 | m | maize                   | line 9  | 30 m  | KP339111 |
| 1484 | Tanganya | 25-Jan-2005 | f | houses                  | line 1  |       | KP339112 |
| 1520 | Tanganya | 26-Jan-2005 | m | houses                  | line 1  |       | KP339113 |
| 1549 | Tanganya | 27-Jan-2005 | m | houses                  | line 1  |       | KP339114 |
| 1586 | Bantou   | 29-Jan-2005 | f | houses                  | line 1  |       | KP339115 |
| 1591 | Bantou   | 29-Jan-2005 | f | houses                  | line 1  |       | KP339116 |
| 1605 | Bantou   | 30-Jan-2005 | m | houses                  | line 1  |       | KP339117 |
| 1606 | Bantou   | 30-Jan-2005 | m | houses                  | line 1  |       | KP339118 |
| 1645 | Bantou   | 31-Jan-2005 | m | houses                  | line 1  |       | KP339119 |
| 1747 | Bantou   | 18-Oct-2011 | m | houses                  | line 1  |       | KP339120 |
| 1755 | Bantou   | 19-Oct-2011 | f | maize                   | line 2  | 100 m | KP339121 |
| 1770 | Bantou   | 19-Oct-2011 | m | maize and ochra         | line 5  | 30 m  | KP339122 |
| 1786 | Bantou   | 20-Oct-2011 | m | houses                  | line 1  |       | KP339123 |
| 1824 | Bantou   | 21-Oct-2011 | m | houses                  | line 1  |       | KP339124 |
| 1826 | Bantou   | 21-Oct-2011 | m | houses                  | line 1  |       | KP339125 |
| 1840 | Bantou   | 21-Oct-2011 | m | maize and ochra         | line 5  | 30 m  | KP339126 |
| 1858 | Tanganya | 23-Oct-2011 | f | houses                  | line 1  |       | KP339127 |
| 1873 | Tanganya | 23-Oct-2011 | m | houses                  | line 1  |       | KP339128 |
| 1878 | Tanganya | 23-Oct-2011 | m | rice field dam          | line 3  | 100 m | KP339129 |
| 1892 | Tanganya | 24-Oct-2011 | f | houses                  | line 1  |       | KP339130 |
| 1918 | Tanganya | 25-Oct-2011 | f | houses                  | line 1  |       | KP339131 |

|       |            |             |   |                 |        |      |          |
|-------|------------|-------------|---|-----------------|--------|------|----------|
| 1925  | Tanganya   | 25-Oct-2011 | f | houses          | line 1 |      | KP339132 |
| 1946  | Tanganya   | 25-Oct-2011 | f | maize and ochra | line 6 | 30 m | KP339133 |
| Sok07 | Sokourala  | 8-Nov-2013  | m | houses          | line 1 |      | KT833175 |
| Sok10 | Sokourala  | 8-Nov-2013  | m | houses          | line 1 |      | KT833176 |
| Sok18 | Sokourala  | 9-Nov-2013  | m | houses          | line 1 |      | KT833177 |
| Sok21 | Sokourala  | 9-Nov-2013  | f | houses          | line 1 |      | KT833178 |
| Sok22 | Sokourala  | 9-Nov-2013  | m | houses          | line 1 |      | KT833179 |
| Sok32 | Sokourala  | 10-Nov-2013 | m | houses          | line 1 |      | KT833180 |
| Sok34 | Sokourala  | 10-Nov-2013 | m | houses          | line 1 |      | KT833181 |
| Dam03 | Damania    | 15-Nov-2013 | m | houses          | line 1 |      | KT833182 |
| Dam05 | Damania    | 15-Nov-2013 | m | houses          | line 1 |      | KT833183 |
| Dam15 | Damania    | 15-Nov-2013 | f | houses          | line 1 |      | KT833184 |
| Dam20 | Damania    | 16-Nov-2013 | f | houses          | line 1 |      | KT833185 |
| Dam38 | Damania    | 16-Nov-2013 | f | houses          | line 1 |      | KT833186 |
| Dam49 | Damania    | 17-Nov-2013 | f | houses          | line 1 |      | KT833187 |
| Yar14 | Yarawalia  | 20-Nov-2013 | f | houses          | line 1 |      | KT833188 |
| Yar20 | Yarawalia  | 20-Nov-2013 | m | houses          | line 1 |      | KT833189 |
| Yar24 | Yarawalia  | 21-Nov-2013 | f | houses          | line 1 |      | KT833190 |
| Yar36 | Yarawalia  | 21-Nov-2013 | f | houses          | line 1 |      | KT833191 |
| Yar46 | Yarawalia  | 21-Nov-2013 | m | houses          | line 1 |      | KT833192 |
| Kho10 | Khoria     | 24-Nov-2013 | f | houses          | line 1 |      | KT833193 |
| Kho29 | Khoria     | 26-Nov-2013 | f | houses          | line 1 |      | KT833194 |
| Kho30 | Khoria     | 26-Nov-2013 | m | houses          | line 1 |      | KT833195 |
| Dal02 | Dalafilani | 28-Nov-2013 | f | houses          | line 1 |      | KT833196 |
| Dal04 | Dalafilani | 28-Nov-2013 | m | houses          | line 1 |      | KT833197 |
| Dal11 | Dalafilani | 28-Nov-2013 | m | houses          | line 1 |      | KT833198 |
| Dal17 | Dalafilani | 29-Nov-2013 | f | houses          | line 1 |      | KT833199 |
| Dal25 | Dalafilani | 29-Nov-2013 | m | houses          | line 1 |      | KT833200 |
| Dal29 | Dalafilani | 30-Nov-2013 | f | houses          | line 1 |      | KT833201 |
| Dal31 | Dalafilani | 30-Nov-2013 | m | houses          | line 1 |      | KT833202 |
| Saf01 | Safrani    | 3-Dec-2013  | f | houses          | line 1 |      | KT833203 |
| Sil03 | Silimi     | 6-Dec-2013  | m | houses          | line 1 |      | KT833204 |
| Bri08 | Brissa     | 14-Dec-2013 | m | houses          | line 1 |      | KT833205 |
| Bri39 | Brissa     | 16-Dec-2013 | m | houses          | line 1 |      | KT833206 |
| Dam71 | Damania    | 26-Mar-2014 | f | houses          | line 1 |      | KT833207 |
| Dam72 | Damania    | 26-Mar-2014 | m | houses          | line 1 |      | KT833208 |
| Dam90 | Damania    | 27-Mar-2014 | f | houses          | line 1 |      | KT833209 |
| Dam95 | Damania    | 27-Mar-2014 | f | houses          | line 1 |      | KT833210 |
| Sok40 | Sokourala  | 3-Apr-2014  | f | houses          | line 1 |      | KT833211 |
| Sok44 | Sokourala  | 3-Apr-2014  | f | houses          | line 1 |      | KT833212 |
| Sok51 | Sokourala  | 3-Apr-2014  | m | houses          | line 1 |      | KT833213 |
| Sok61 | Sokourala  | 4-Apr-2014  | m | houses          | line 1 |      | KT833214 |
| Sok62 | Sokourala  | 4-Apr-2014  | f | houses          | line 1 |      | KT833215 |
| Sok75 | Sokourala  | 5-Apr-2014  | f | houses          | line 1 |      | KT833216 |
| Sok76 | Sokourala  | 5-Apr-2014  | f | houses          | line 1 |      | KT833217 |
| Sok77 | Sokourala  | 5-Apr-2014  | m | houses          | line 1 |      | KT833218 |

|        |            |             |   |        |        |          |
|--------|------------|-------------|---|--------|--------|----------|
| Son85  | Sonkonia   | 8-Apr-2014  | f | houses | line 1 | KT833219 |
| Son109 | Sonkonia   | 9-Apr-2014  | m | houses | line 1 | KT833220 |
| Yar51  | Yarawalia  | 13-Apr-2014 | f | houses | line 1 | KT833221 |
| Dal53  | Dalafilani | 19-Apr-2014 | m | houses | line 1 | KT833222 |

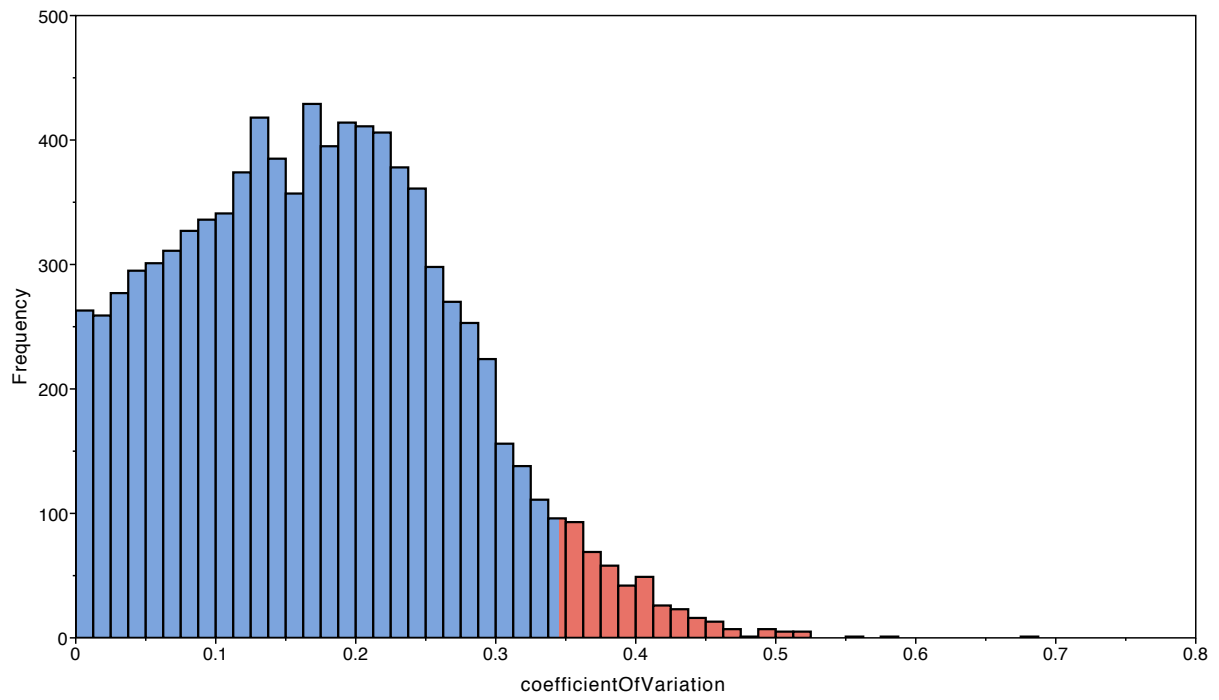

Figure S1: Frequency distribution of the coefficient of variation for model #3. The median is 0.13, indicating only minor differences in the molecular clock rate between branches.

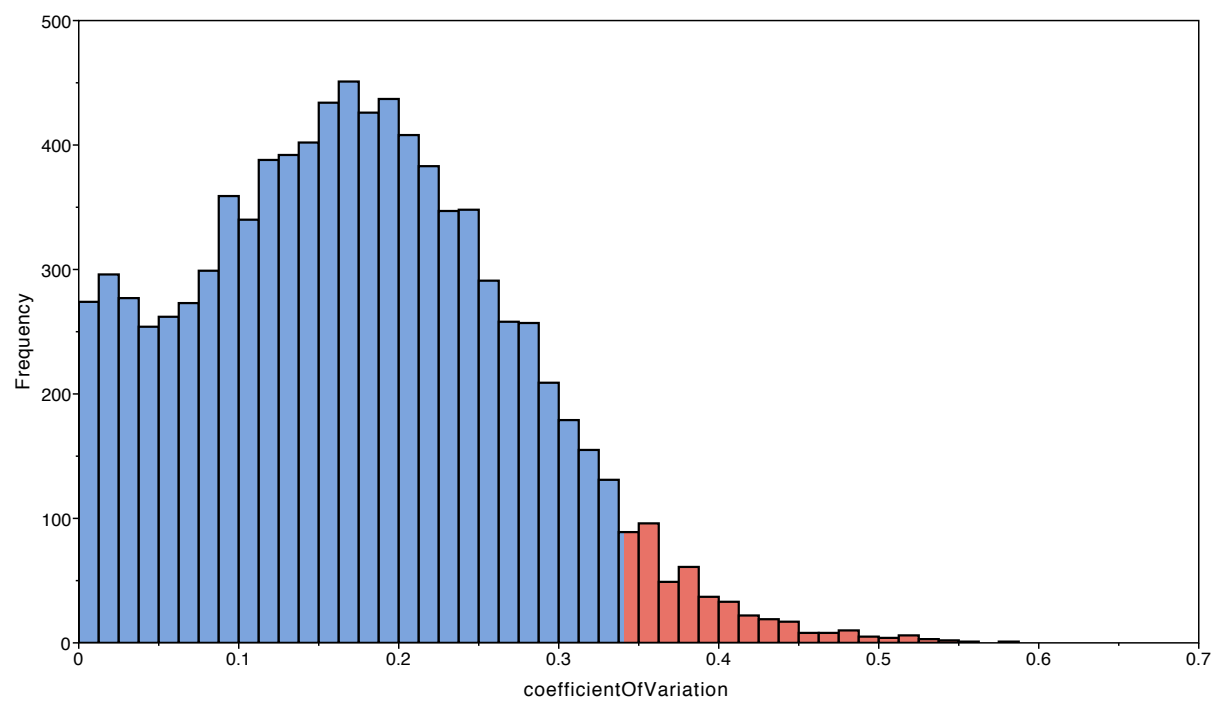

Figure S2: Frequency distribution of the coefficient of variation for model #4. The median is 0.13, indicating only minor differences in the molecular clock rate between branches.

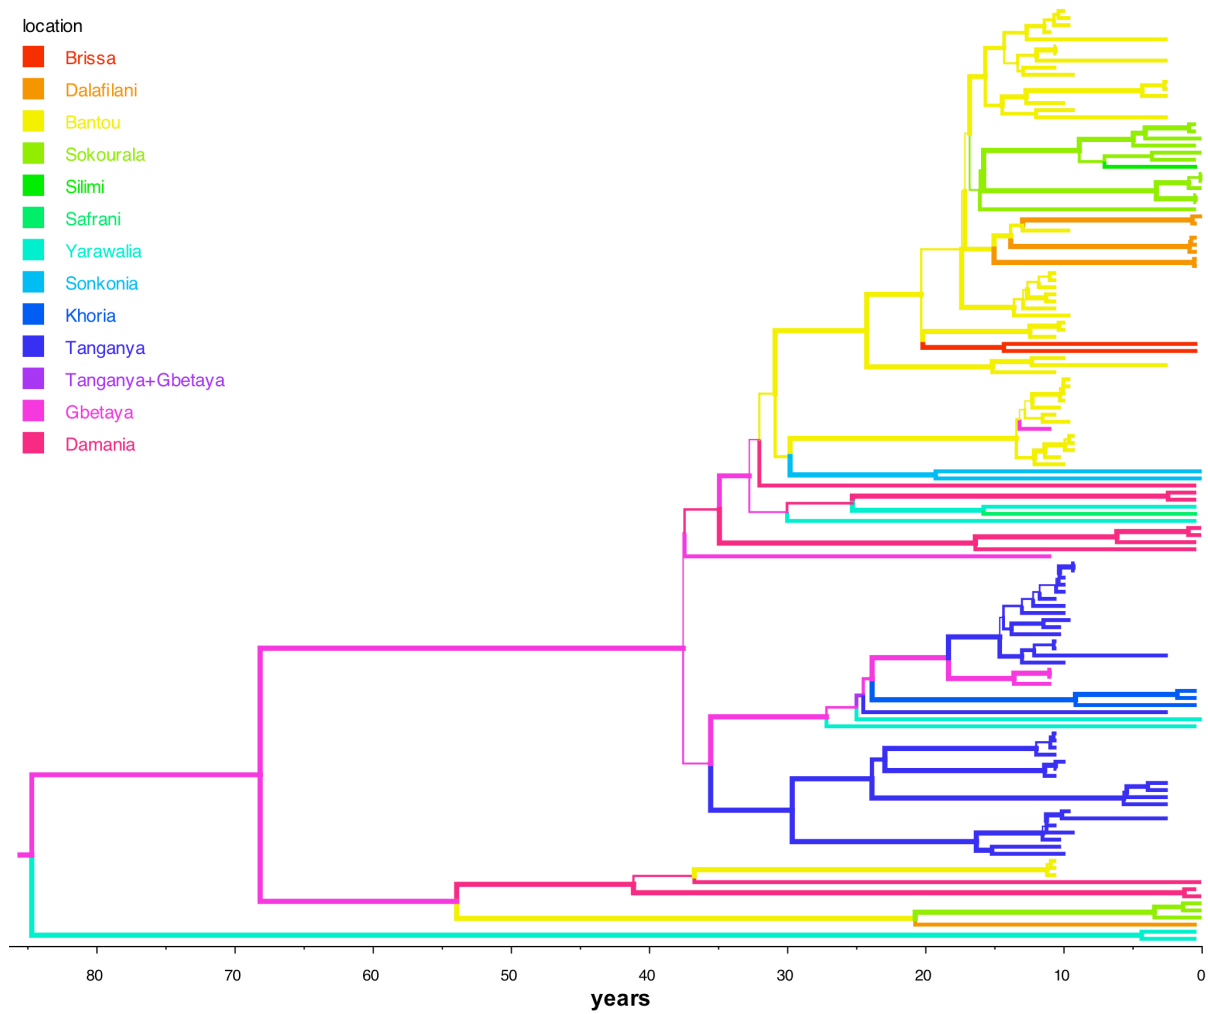

Figure S3: Phylogeographic analysis of LASV NP sequences from 132 *Mastomys natalensis* to visualise virus spread. The tree was inferred by using the Bayesian Markov Chain Monte Carlo method with GTR+gamma, strict clock, constant population size, and villages as traits. The villages are sorted by color gradient from North (Brissa) to South (Damania). Posterior support is indicated by the thickness of the branches (high values are represented by thick lines). Each change of color along the branches indicates virus spread from one village to another.
